# Supplementary material for: Quality Management System for an IoT Meteorological Sensor Network—Application to Smart Seoul Data of Things (S-DoT)
Source: MDPI journal article supplement (doi:10.3390/s23052384), 2023-02-21
Supplement: s1 [file s1]

## Supplementary Materials

# Quality Management System for an IoT Meteorological Sensor Network – Application to Smart Seoul Data of Things (S-DoT)

Moon-Soo Park <sup>1,\*</sup> and Kitae Baek <sup>2</sup>

<sup>1</sup> Department of Climate and Environment, Sejong University, Seoul 05006, Republic of Korea

<sup>2</sup> Climate Change & Environmental Research Center, Sejong University, Seoul 05006, Republic of Korea

\* Correspondence: moonsoo@sejong.ac.kr; Tel.: +82-2-6935-2558

**Table S1.** Mean bias (MB), mean absolute bias (MAB), and root mean square error (RMSE) for different imputation methods at station ID of V02Q1940941 on 24 July 2021.

| Method                     | MB     | MAB  | RMSE |
|----------------------------|--------|------|------|
| Random                     | +0.09  | 3.39 | 4.18 |
| mean                       | +0.35  | 2.72 | 3.13 |
| Locf <sup>1</sup>          | -0.005 | 0.08 | 0.13 |
| Nocb <sup>2</sup>          | -0.003 | 0.07 | 0.12 |
| Linear interpolation       | -0.004 | 0.04 | 0.07 |
| Spline interpolation       | -0.007 | 0.06 | 0.09 |
| Stineman interpolation     | -0.004 | 0.04 | 0.06 |
| Simple moving average      | -0.007 | 0.08 | 0.12 |
| Linear moving average      | -0.006 | 0.07 | 0.10 |
| Exponential moving average | -0.006 | 0.06 | 0.09 |

<sup>1</sup>locf: last observation carried forward, <sup>2</sup>nocb: next observation carried backward.

**Table S2.** Mean bias (MB), mean absolute bias (MAB), and root mean square error (RMSE) for different imputation methods at a station ID of V02Q1940142 on 24 July 2021.

| Method                     | MB     | MAB  | RMSE |
|----------------------------|--------|------|------|
| Random                     | 0.152  | 2.71 | 3.36 |
| mean                       | -0.011 | 2.15 | 2.36 |
| locf                       | 0.011  | 0.06 | 0.09 |
| nocb                       | 0.011  | 0.06 | 0.10 |
| Linear interpolation       | 0.011  | 0.04 | 0.05 |
| Spline interpolation       | 0.007  | 0.05 | 0.06 |
| Stineman interpolation     | 0.011  | 0.04 | 0.05 |
| Simple moving average      | 0.011  | 0.06 | 0.08 |
| Linear moving average      | 0.011  | 0.05 | 0.07 |
| Exponential moving average | 0.012  | 0.05 | 0.06 |
| Kalman StructTS            | 0.011  | 0.04 | 0.05 |
| Kalman auto.arima          | 0.009  | 0.04 | 0.06 |
